# Supplementary material for: Functional Disassociation Between the Protein Domains of MSMEG_4305 of Mycolicibacterium smegmatis (Mycobacterium smegmatis) in vivo
Source: Front Microbiol. 2020 Aug 19;11:2008. doi: 10.3389/fmicb.2020.02008 (PMC7466739; doi:10.3389/fmicb.2020.02008)
Supplement: Supplementary file 1 [file Table_1.XLSX]

## Sheet: Arkusz1
Gene	Primer orientation	Primer sequence 5'
Gene replacement
cobIJ first flank	forward	CAGTACTGCTCGGCGGGTGTGACACC
	reverse	CAAGCTTCACCAGTTCGGGGTCGCCTG
cobIJ second flank	forward	CAAGCTTGTCGAGGTGCGCGTCATCCC
	reverse	CGGATCCGTTGCCACCTCGGTGCCCAG
prpR first flank	forward	GGAGTACTCGGTCATCGAAAGATTCCTGGTG
	reverse	GGAAGCTTTTAGGTAAGCAGAAGCAGCACGGG
prpR second flank	forward	GGAAGCTTGCTGCGACCTCGCGCACGCC
	reverse	GGTTAATTAACTACGGGTCGCCTTCGTCGTC
Gene complementation
cobIJ	forward	CGGATCCATGAGCGAGAACAAGCACGGCAC
	reverse	CTCTAGAGTGCGTCAGCCGGGGTAGGTG
4305 N' tern	forward	CAGATCTGTGAAGGTTCTCGTCGAGGCCGAC
	reverse	CTCTAGATTACCGTGTAGGCGCGCCGGTCAC
Rv2228c	forward	CAGATCTGTGAAAGTTGTCATCGAAGCCGAC
	reverse	CTCTAGACTATAGATAGCCTGTCTGATTCACCAATCG
Southern blot
cobIJ probe	forward	CAGTACTGCTCGGCGGGTGTGACACC
	reverse	CGGATCCGTTGCCACCTCGGTGCCCAG
prpR probe	forward	GTGGCGAAGACGTTCATAGGCCC
	reverse	TCAGCGGGGGTCGTTGACCG
4305 C' terminal probe	forward	CGGTGTCATACGCACGCTGCAG
	reverse	GATGCCGCAGCGGGAATCG
4305 N' terminal probe	forward	CGACAACGACGCCAGGTCCAG
	reverse	GGGACACCAGCGTCGAACCG
qPCR
radA	forward	ATCCTTCGGGACTGTTCCTCGACCAG
	reverse	GATCGTTGCTGTTGATCGGCATGC
accD4	forward	GCACTCGGAATGCCCTTCTTCTC
	reverse	ACGAACAAGACCACCGCTGAACTC
cobL	forward	ACGCGCGACCGTGGTGTTC
	reverse	TCGACACGTGCGGCAGCA
PCR confirmation of gene complementation
Rv2228c	forward	CAGATCTGTGAAAGTTGTCATCGAAGCCGAC
	reverse	CTCTAGACTATAGATAGCCTGTCTGATTCACCAATCG
MSMEG_4305	forward	CAGATCTGTGAAGGTTCTCGTCGAGGC
	reverse	CTCTAGATGCACTCGTGAGCTACAGGTACGC
